# Supplementary material
Source: PubMed Central journal article supplement (PMC2657382)
Supplement: 0813411106_0813411106SI.pdf [file 0813411106_0813411106SI.pdf]

# Supporting Information

Cole et al. 10.1073/pnas.0813411106

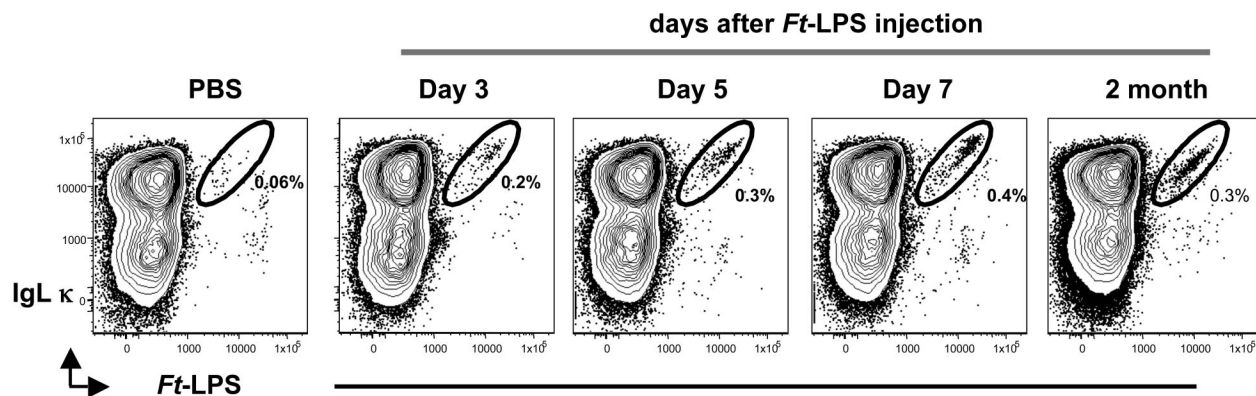

**Fig. S1.** *Ft*-LPS induces the appearance of PerC *Ft*-LPS-binding (*Ft*-LPS<sup>+</sup>) B cells. PerC cells from C57BL/6J mice immunized i.p. with *Ft*-LPS are stained with fluorochrome-labeled *Ft*-LPS and fluorescent antibodies recognizing a panel of B cell surface antigens. The total live B cell (CD19<sup>+</sup>) population is gated to display  $\kappa$ -light chain expression and *Ft*-LPS binding. The circled cells in each FACS plot are PerC B cells that bind *Ft*-LPS, and the relative proportion of these cells in total B cell population is indicated.

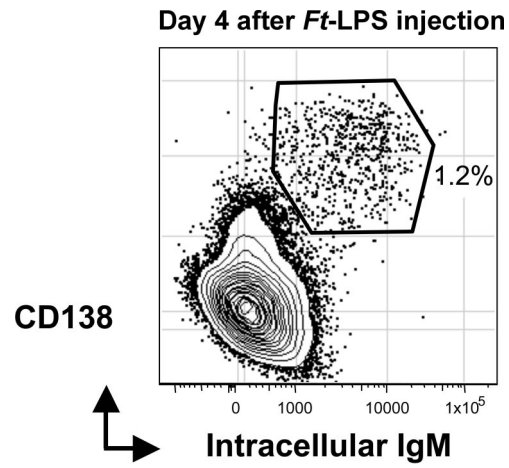

**Fig. S2.** CD138<sup>hi</sup> surface IgM<sup>+</sup> B cells in the spleen expressing high levels of intracellular IgM. Live splenic B cells (B220<sup>+</sup> IgM<sup>+</sup>) from mice immunized with *Ft*-LPS 4 days prior are gated to display surface CD138 expression and intracellular IgM level. Cells in the gate represent IgM plasma cells or plasmablasts ( $\approx 30\%$  of which are *Ft*-LPS<sup>+</sup>) that express high levels of CD138 and intracellular IgM.

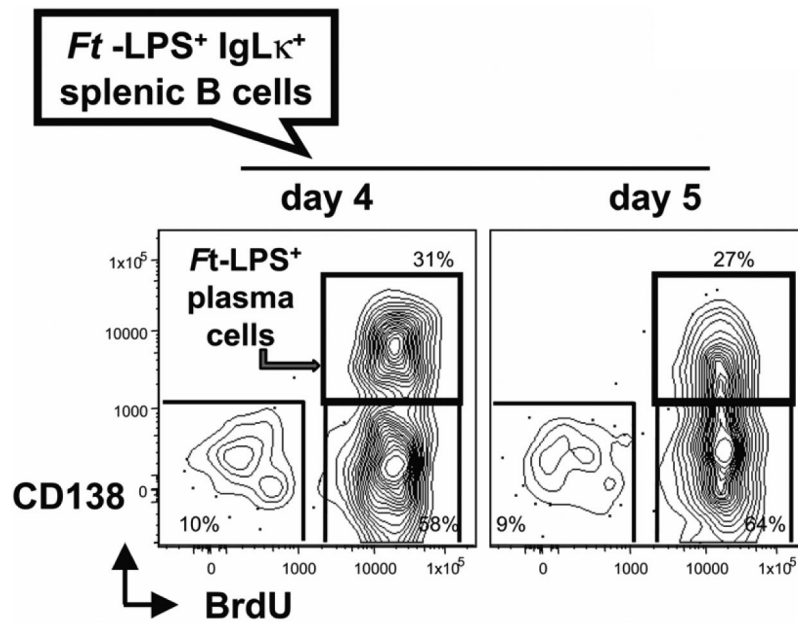

**Fig. S3.** *Ft*-LPS<sup>+</sup> B-1a cells in spleen undergo cell division during the first 4 to 5 days after *Ft*-LPS immunization. One day after i.p. injection of 100 ng *Ft*-LPS, mice are provided with BrdU-containing (0.8 mg/mL) water for 3 to 4 days. Live *Ft*-LPS<sup>+</sup> Ig<sub>κ</sub><sup>+</sup> splenic B-1a cells on day 4 and day 5 after *Ft*-LPS immunization are gated to display CD138 expression and BrdU-incorporation (an index of cell division).

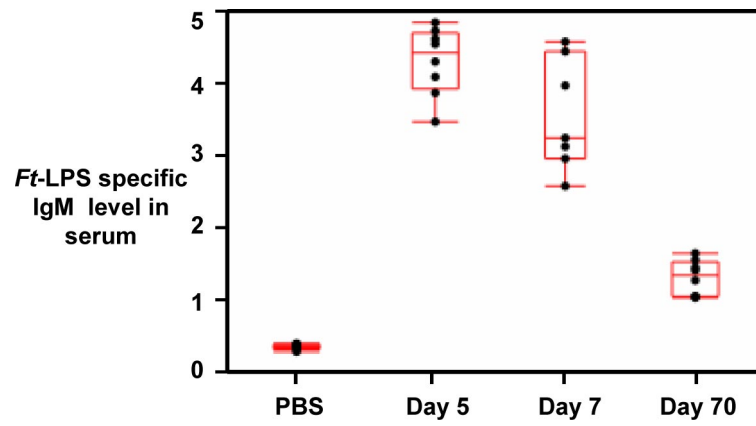

**Fig. S4.** Low levels of *Ft*-LPS-specific IgM antibodies are sustained in serum long after *Ft*-LPS immunization. Serum from PBS control mice or mice immunized with *Ft*-LPS are collected 5, 7, and 70 days after immunization and serum anti-*Ft*-LPS IgM antibodies are measured using a FACS "bead assay," in which the amount of fluorescent signaling (mean fluorescent intensity) is proportionally indicative of the amount of *Ft*-LPS-specific IgM in serum. Each dot represents data from an individual mouse. Horizontal lines in the "quartile box plots" indicate the 25th, 50th, and 75th percentile values.

**Table S1. Pretreatment of antibody-deficient mice with *Ft*-LPS fails to afford protection against lethal *Ft* LVS challenge**

| Strain     | Phenotype                                   | Treatment (Day 0) | Challenge (Day 3)            | Live/Total | % Survival | MTD*          |
|------------|---------------------------------------------|-------------------|------------------------------|------------|------------|---------------|
| BALB/cByJ  | WT                                          | Saline            | $\approx 10^3$ <i>Ft</i> LVS | 0/5        | 0          | 5.4 $\pm$ 0.6 |
| JhD        | No B cells<br>No Abs                        | Saline            | $\approx 10^3$ <i>Ft</i> LVS | 0/5        | 0          | 6.4 $\pm$ 0.9 |
| BALB/cByJ  | WT                                          | 100 ng LPS        | $\approx 10^3$ <i>Ft</i> LVS | 5/5        | 100        | —             |
| JhD        | No B cells<br>No Abs                        | 100 ng LPS        | $\approx 10^3$ <i>Ft</i> LVS | 0/5        | 0          | 6.6 $\pm$ 0.5 |
| mIg-Tg     | Mature B cells<br>No secreted<br>Ab         | 100 ng LPS        | $\approx 10^3$ <i>Ft</i> LVS | 0/5        | 0          | 6.8 $\pm$ 0.4 |
| (m+s)Ig-Tg | Mature B cells<br>Restricted<br>secreted Ab | 100 ng LPS        | $\approx 10^3$ <i>Ft</i> LVS | 0/4        | 0          | 6.8 $\pm$ 0.5 |

Male WT (BALB/cByJ) and mice from B cell/antibody-deficient strains were pretreated with saline or 100 ng *Ft*-LPS intradermally (i.d.) 3 days prior to challenge with  $\approx 10^3$  CFU *Ft* LVS i.p. Results are derived from a single representative experiment of 3 experiments of similar design and outcome.

\*Arithmetic mean time to death (MTD)  $\pm$  SD

**Table S2. Pretreatment of *Btk*, B-1a cell-deficient *xid* mice with *Ft*-LPS fails to afford protection against lethal *Ft* LVS challenge**

| Strain          | Phenotype                 | Treatment (Day 0) | Challenge (Day 3)    | Live/Total | % Survival | MTD*          |
|-----------------|---------------------------|-------------------|----------------------|------------|------------|---------------|
| CBA/CaJ         | WT                        | Saline            | $10^2$ <i>Ft</i> LVS | 0/6        | 0          | $7 \pm 0.6$   |
| CBA/CaJ         | WT                        | 100 ng LPS        | $10^2$ <i>Ft</i> LVS | 6/6        | 100        | —             |
| CBA- <i>xid</i> | <i>Btk</i> <sup>-/-</sup> | Saline            | $10^2$ <i>Ft</i> LVS | 0/6        | 0          | $6.7 \pm 0.8$ |
| CBA- <i>xid</i> | B-1a-deficient            |                   |                      |            |            |               |
| CBA- <i>xid</i> | <i>Btk</i> <sup>-/-</sup> | 100 ng LPS        | $10^2$ <i>Ft</i> LVS | 0/4        | 0          | $6.5 \pm 0.8$ |
|                 | B-1a-deficient            |                   |                      |            |            |               |

Male WT (CBA/CaJ) and *xid* (CBA/CaHN-BTK <*xid*>/J) mice were pretreated with saline or 100 ng *Ft*-LPS i.d. 3 days prior to challenge with  $10^2$  CFU *Ft* LVS i.p. Results are shown from a single representative experiment of 3 experiments of similar design and outcome.

\*Arithmetic MTD  $\pm$  SD.
